# Supplementary material for: Solvent and anion facilitated conformational changes in benzylamine substituted thiazolamine
Source: Royal Society of Chemistry journal article supplement (doi:10.1039/c6nj00154h), 2016-01-01
Supplement: c6nj00154h1.pdf [file c6nj00154h1.pdf]

## Supporting information

Journal : New Journal Of Chemistry

Manuscript No: ID NJ-LET-01-2016-000154

Title: Solvent and anion facilitated conformational changes in benzylamine substituted  
thiazolamine

Nithi Phukan, and Jubaraj B. Baruah\*

Department of Chemistry, Indian Institute of Technology Guwahati, Guwahati 781 039 Assam,  
India, Fax: + 91-361-2690762; Ph. + 91-361-2582311;

email: [juba@iitg.ernet.in](mailto:juba@iitg.ernet.in); Url: <http://www.iitg.ac.in/juba>

**Crystal Structure determination by X-ray crystallography:** Single crystal X-ray diffraction data for **La**, **Lb**, **1**, **2**, and **3** were collected on a Oxford SuperNova diffractometer. SMART was used for data collection and also for indexing the reflections and determining the unit cell parameters. Cell refinement was performed using SAINT software. The structures were solved by direct methods and refined by full-matrix least squares calculations using SHELXTL. All the non-hydrogen atoms were refined in the anisotropic approximation against  $F^2$  of all reflections. The hydrogen atoms attached to the heteroatom were located in the difference Fourier synthesis maps and refined with isotropic displacement coefficients. Crystal parameters are summarized in Table 1S.

Table 1S: Crystallographic Parameters of the Polymorphs **La**, **Lb** and **1-3**.

| Compound No.    | La                                                            | Lb                                                            | 1                                                                                            | 2                                                                            | 3                                                                                            |
|-----------------|---------------------------------------------------------------|---------------------------------------------------------------|----------------------------------------------------------------------------------------------|------------------------------------------------------------------------------|----------------------------------------------------------------------------------------------|
| Formule         | C <sub>16</sub> H <sub>18</sub> N <sub>4</sub> S <sub>2</sub> | C <sub>16</sub> H <sub>18</sub> N <sub>4</sub> S <sub>2</sub> | C <sub>16</sub> H <sub>24</sub> Br <sub>2</sub> N <sub>4</sub> O <sub>2</sub> S <sub>2</sub> | C <sub>16</sub> H <sub>20</sub> N <sub>6</sub> O <sub>6</sub> S <sub>2</sub> | C <sub>16</sub> H <sub>30</sub> N <sub>4</sub> O <sub>16</sub> P <sub>4</sub> S <sub>2</sub> |
| Mol. wt.        | 330.46                                                        | 330.46                                                        | 528.31                                                                                       | 456.50                                                                       | 722.44                                                                                       |
| Crystal system  | Monoclinic                                                    | monoclinic                                                    | Triclinic                                                                                    | monoclinic                                                                   | monoclinic                                                                                   |
| Space group     | C 2/c                                                         | C 2/c                                                         | P-1                                                                                          | P 21/n                                                                       | P 21/c                                                                                       |
| Temperature (K) | 296(2)                                                        | 296(2)                                                        | 296(2)                                                                                       | 296(2)                                                                       | 296(2)                                                                                       |
| Wavelength (Å)  | 0.71073                                                       | 0.71073                                                       | 0.71073                                                                                      | 0.71073                                                                      | 0.71073                                                                                      |
| a (Å)           | 19.017(2)                                                     | 16.2875(16)                                                   | 7.5072(6)                                                                                    | 7.0178(17)                                                                   | 8.0722(8)                                                                                    |
| b (Å)           | 5.1090(5)                                                     | 9.6657(10)                                                    | 8.4305(7)                                                                                    | 16.125(4)                                                                    | 19.8911(19)                                                                                  |
| c (Å)           | 17.805(2)                                                     | 13.4747(13)                                                   | 9.1386(7)                                                                                    | 9.208(2)                                                                     | 9.3871(9)                                                                                    |
| α (°)           | 90.00                                                         | 90.00                                                         | 73.216(4)                                                                                    | 90.00                                                                        | 90.00                                                                                        |
| β (°)           | 99.507(12)                                                    | 127.121(8)                                                    | 85.375(5)                                                                                    | 104.814(15)                                                                  | 98.293(4)                                                                                    |
| γ (°)           | 90.00                                                         | 90.00                                                         | 74.943(5)                                                                                    | 90.00                                                                        | 90.00                                                                                        |

|                                |                                            |                                              |                                           |                                            |                                            |
|--------------------------------|--------------------------------------------|----------------------------------------------|-------------------------------------------|--------------------------------------------|--------------------------------------------|
| V (Å <sup>3</sup> )            | 1706.2(3)                                  | 1691.5(3)                                    | 534.72(7)                                 | 1007.4(4)                                  | 1491.5(3)                                  |
| Z                              | 4                                          | 4                                            | 1                                         | 2                                          | 2                                          |
| Density/Mgm <sup>-3</sup>      | 1.287                                      | 1.298                                        | 1.641                                     | 1.505                                      | 1.609                                      |
| Abs. Coeff. /mm <sup>-1</sup>  | 0.314                                      | 0.316                                        | 4.003                                     | 0.312                                      | 0.470                                      |
| Abs. Correction                | multi-scan                                 | multi-scan                                   | multi-scan                                | multi-scan                                 | none                                       |
| F(000)                         | 696                                        | 696                                          | 266                                       | 476                                        | 748                                        |
| Total reflections              | 1522                                       | 1518                                         | 1900                                      | 1812                                       | 2691                                       |
| Reflections, $I > 2\sigma(I)$  | 1217                                       | 1273                                         | 1593                                      | 1298                                       | 2473                                       |
| Max. $\theta/^\circ$           | 25.24                                      | 25.23                                        | 25.24                                     | 25.24                                      | 25.24                                      |
| Ranges (h, k, l)               | -20 ≤ h ≤ 22<br>-6 ≤ k ≤ 6<br>-19 ≤ l ≤ 20 | -19 ≤ h ≤ 19<br>-11 ≤ k ≤ 11<br>-14 ≤ l ≤ 16 | -9 ≤ h ≤ 9<br>-6 ≤ k ≤ 10<br>-10 ≤ l ≤ 10 | -7 ≤ h ≤ 8<br>-19 ≤ k ≤ 19<br>-10 ≤ l ≤ 11 | -9 ≤ h ≤ 8<br>-23 ≤ k ≤ 23<br>-11 ≤ l ≤ 11 |
| Complete to 2 $\theta$ (%)     | 98.4                                       | 99.0                                         | 98.4                                      | 99.7                                       | 99.3                                       |
| Data/restrain/parameter        | 1522/0/101                                 | 1518/0/101                                   | 1900/2/127                                | 1812/0/137                                 | 2691/15/211                                |
| Goof(F2)                       | 1.062                                      | 1.089                                        | 1.083                                     | 1.058                                      | 1.024                                      |
| R indices [ $I > 2\sigma(I)$ ] | 0.0659                                     | 0.0380                                       | 0.0303                                    | 0.0678                                     | 0.0298                                     |
| R indices (all data)           | 0.0765                                     | 0.0451                                       | 0.0386                                    | 0.0906                                     | 0.0331                                     |

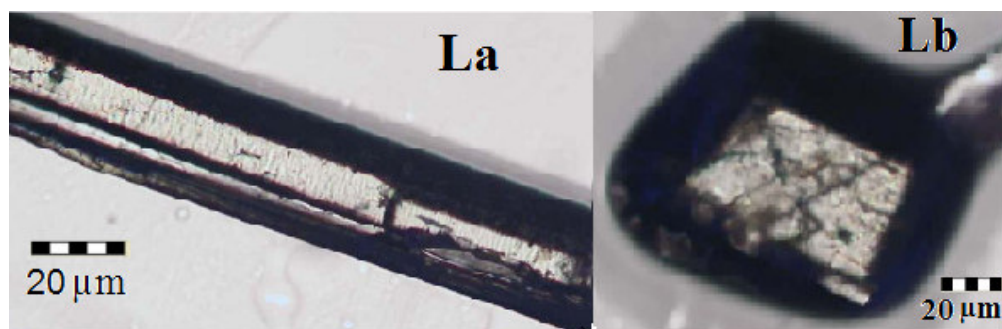

Figure S1: Crystal morphologies of **La** and **Lb**

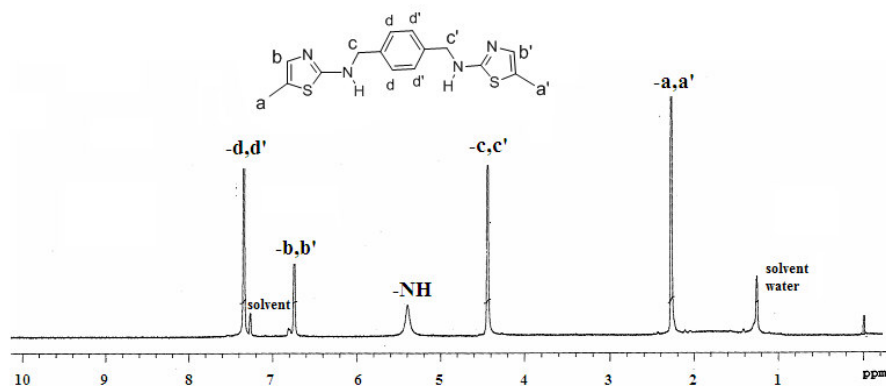

Figure S2: <sup>1</sup>H-NMR (CDCl<sub>3</sub>) spectrum of **L**.

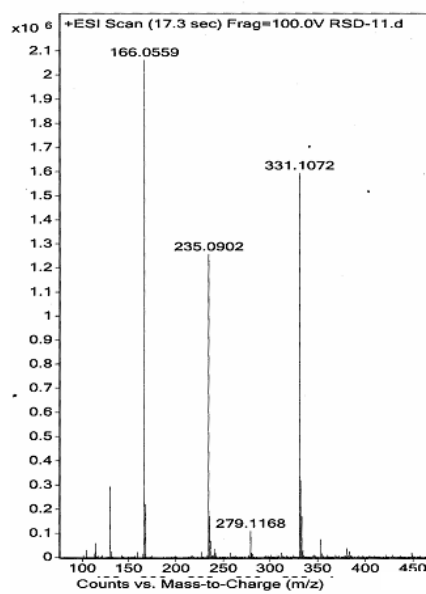

Figure S3: ESI mass spectrum of L.

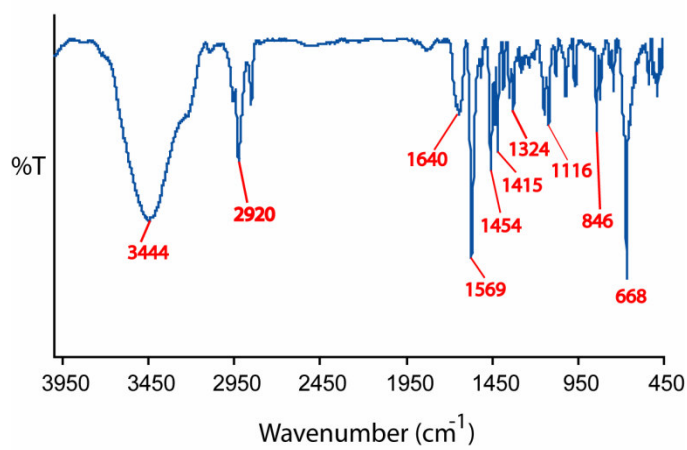

Figure S4: IR (KBr) spectrum of La.

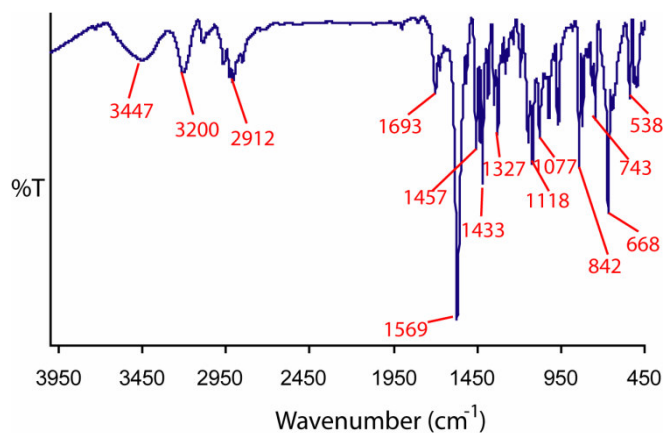Figure S5: IR (KBr) spectrum of **Lb**.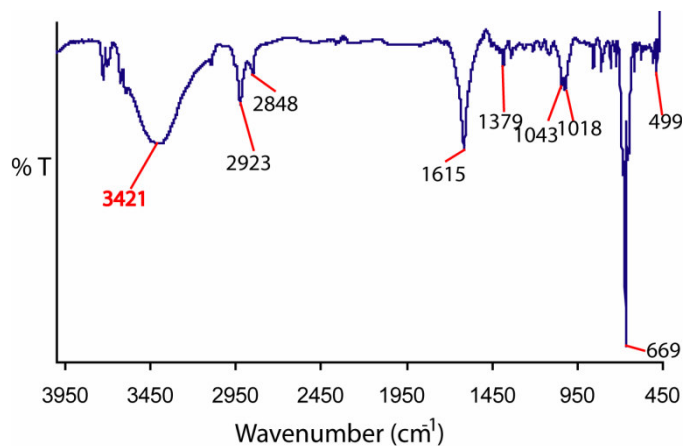Figure S6: IR (KBr) spectrum of salt **1**.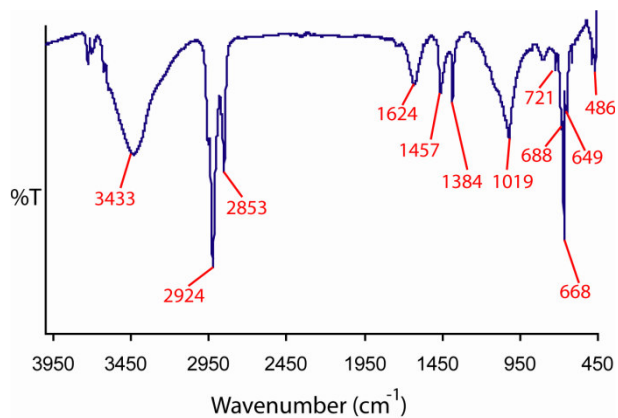Figure S7: IR (KBr) spectrum of salt **2**.

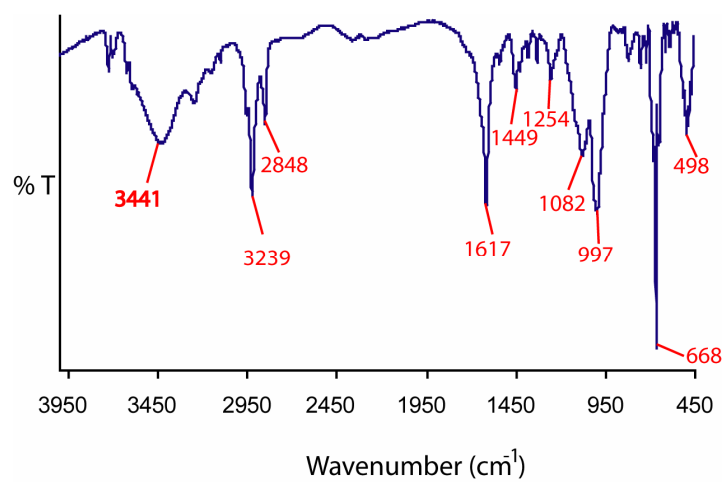

Figure S8: IR (KBr) spectrum of salt 3.

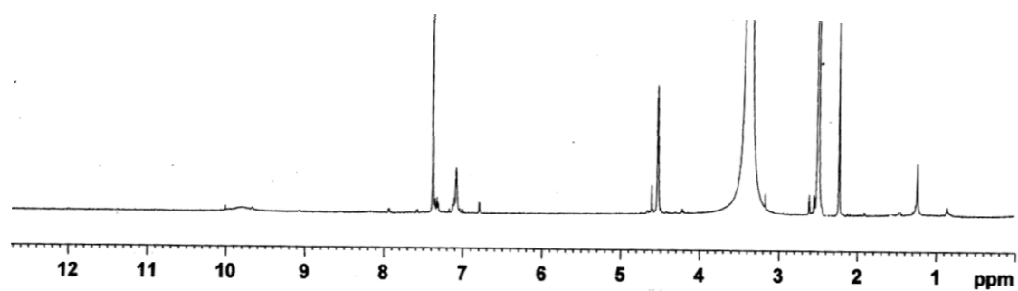Figure S9:  $^1\text{H-NMR}$  (DMSO- $\text{d}_6$ ) spectrum of salt 1.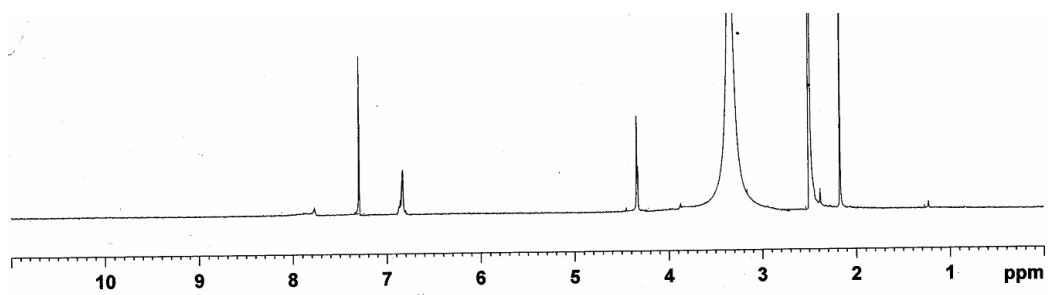Figure S10:  $^1\text{H-NMR}$  (DMSO- $\text{d}_6$ ) spectrum of salt 2.

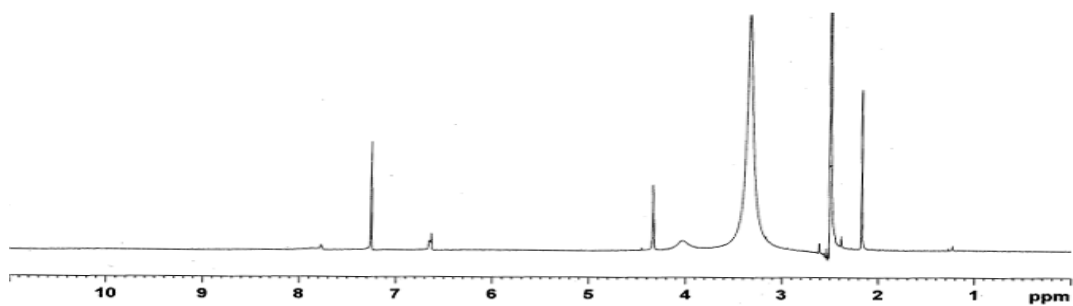

Figure S11:  $^1\text{H-NMR}$  ( $\text{DMSO-d}_6$ ) spectrum of salt **3**.

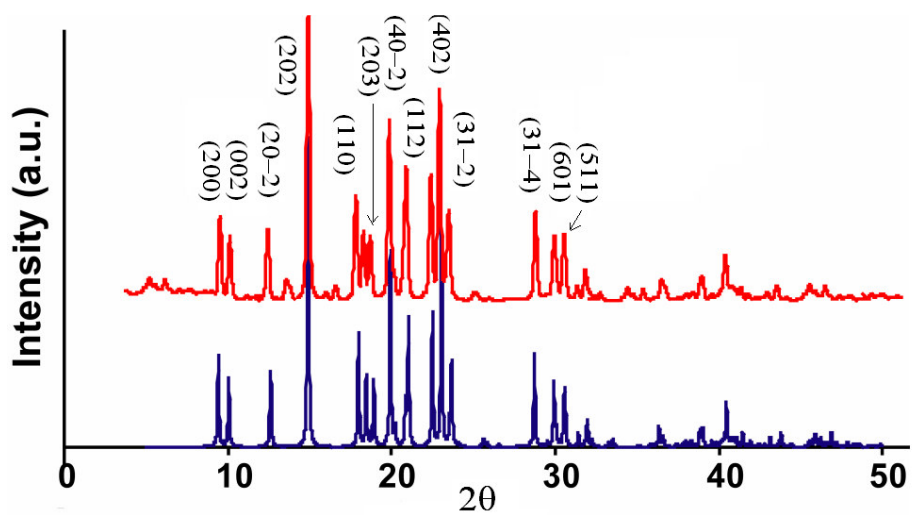

Figure S12: PXRD patterns of **La** (red = experimental, blue = generated from CIF).

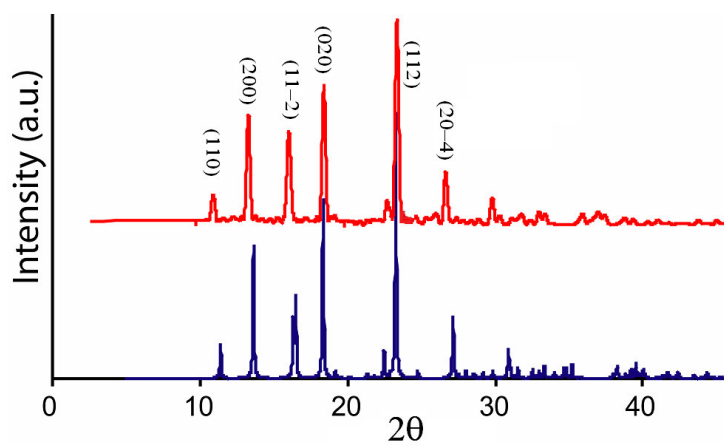

Figure S13: PXRD patterns of **Lb** (red = experimental, blue = generated from CIF).

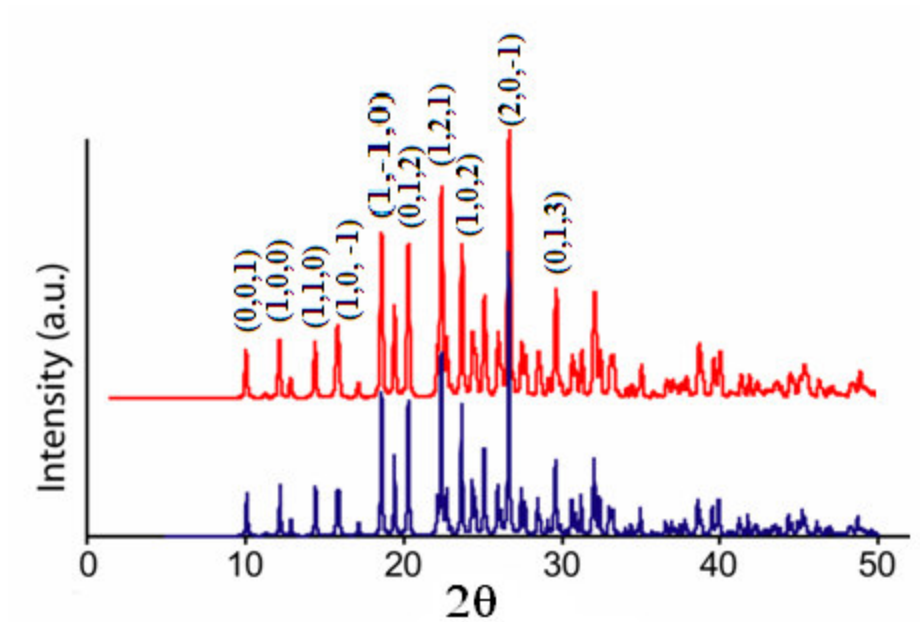

Figure S14: PXRD patterns of **1** (red = experimental, blue = generated from CIF).

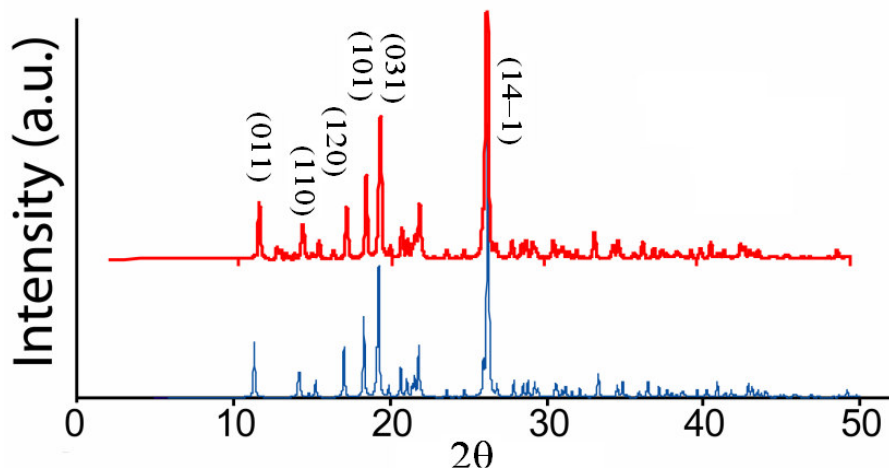

Figure S15: PXRD patterns of **2** (red = experimental, blue = generated from CIF).

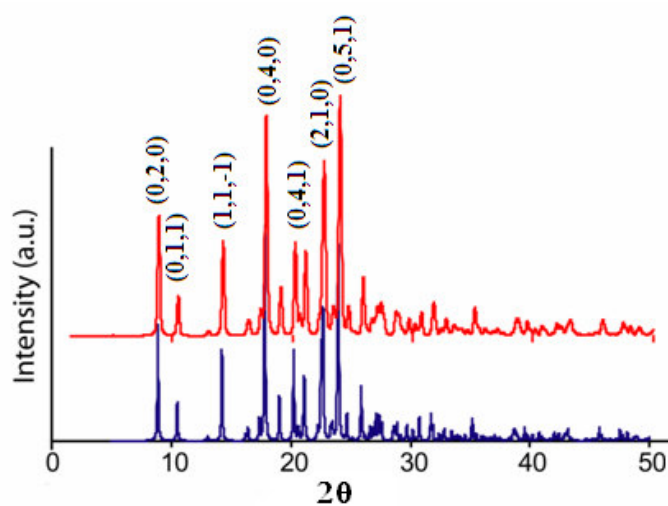

Figure S16: PXRD patterns of **3** (red = experimental, blue = generated from CIF).

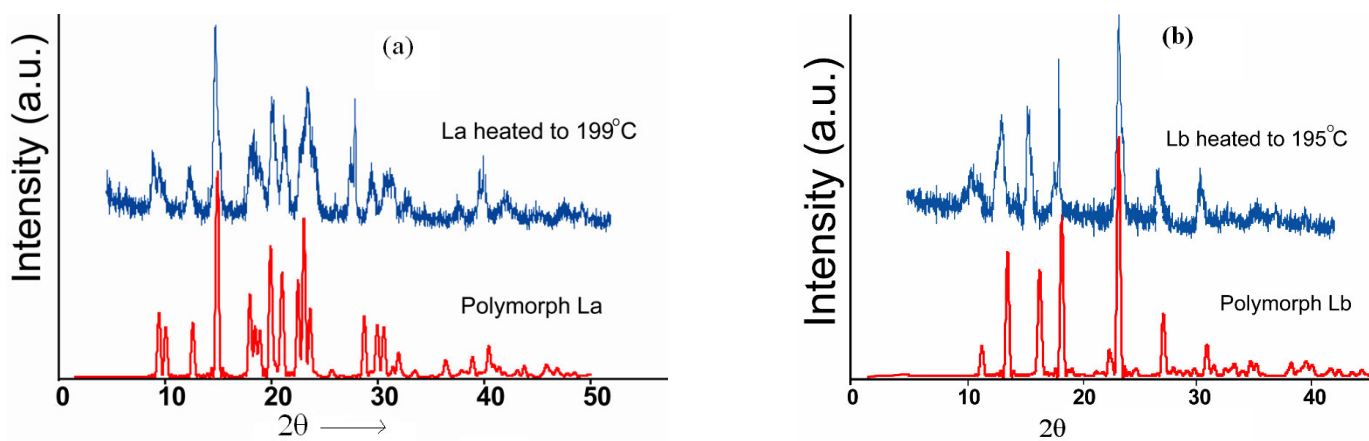

Figure S17: PXRD patterns of (a) **L<sub>a</sub>** and (b) **L<sub>b</sub>** at different temperatures.

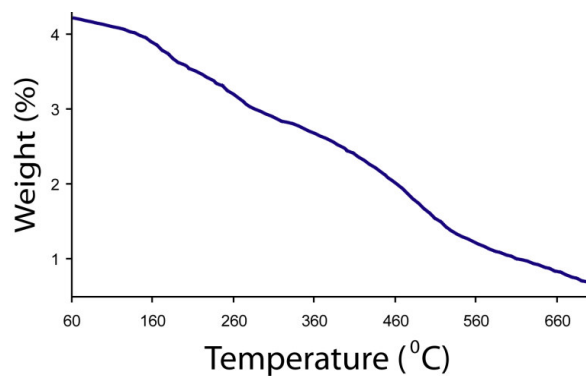

Figure S18: Thermogram of **3** (heating rate 5 °C/min).



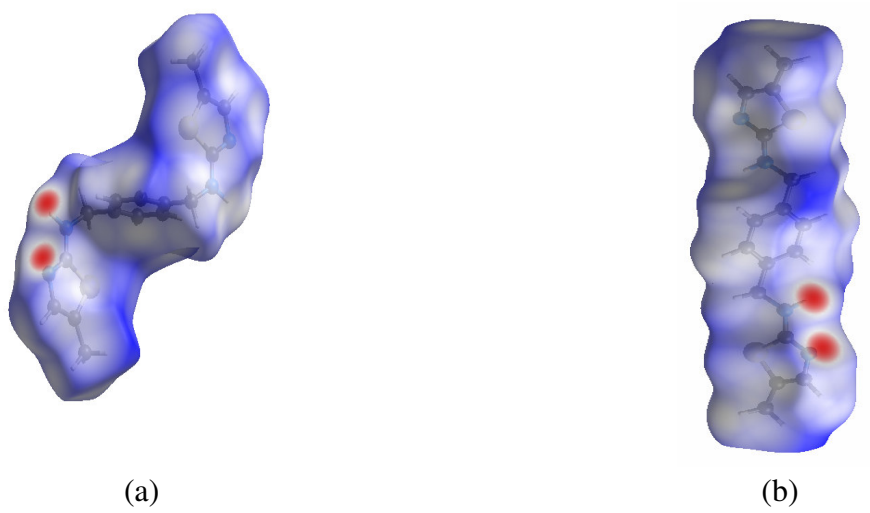

Figure S19: Hirshfeld surface of (a) polymorph **La** and (b) polymorph **Lb**.

---

**Interactions in La**

---

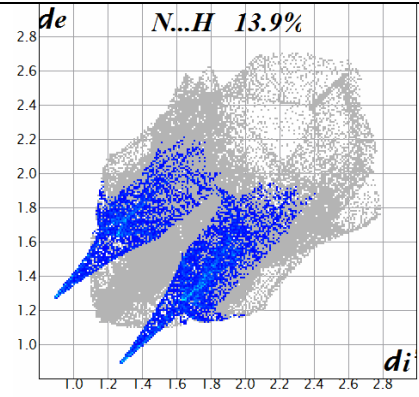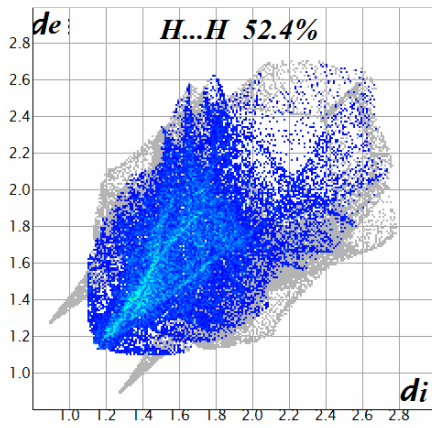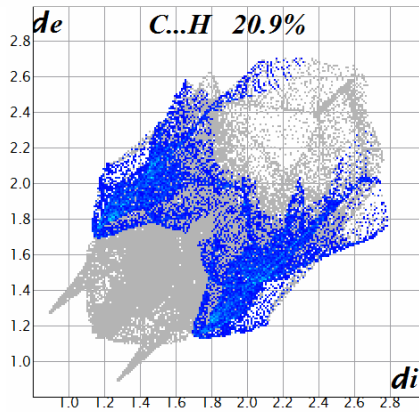

---

**Interactions in Lb**

---

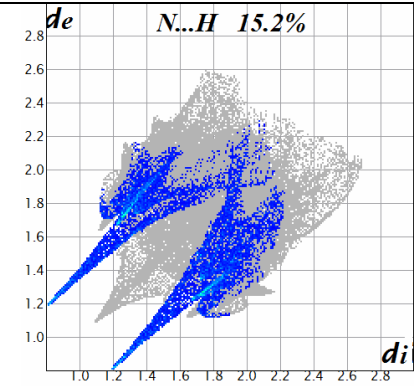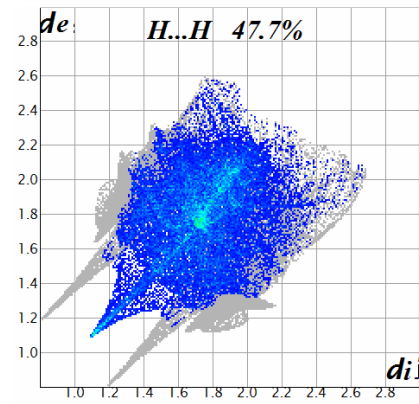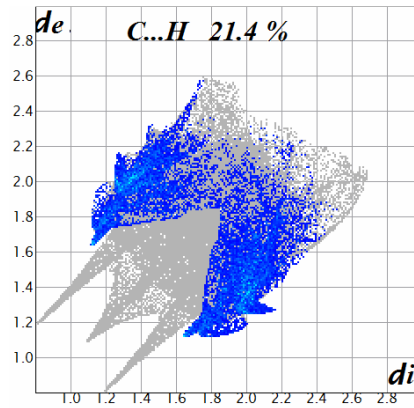

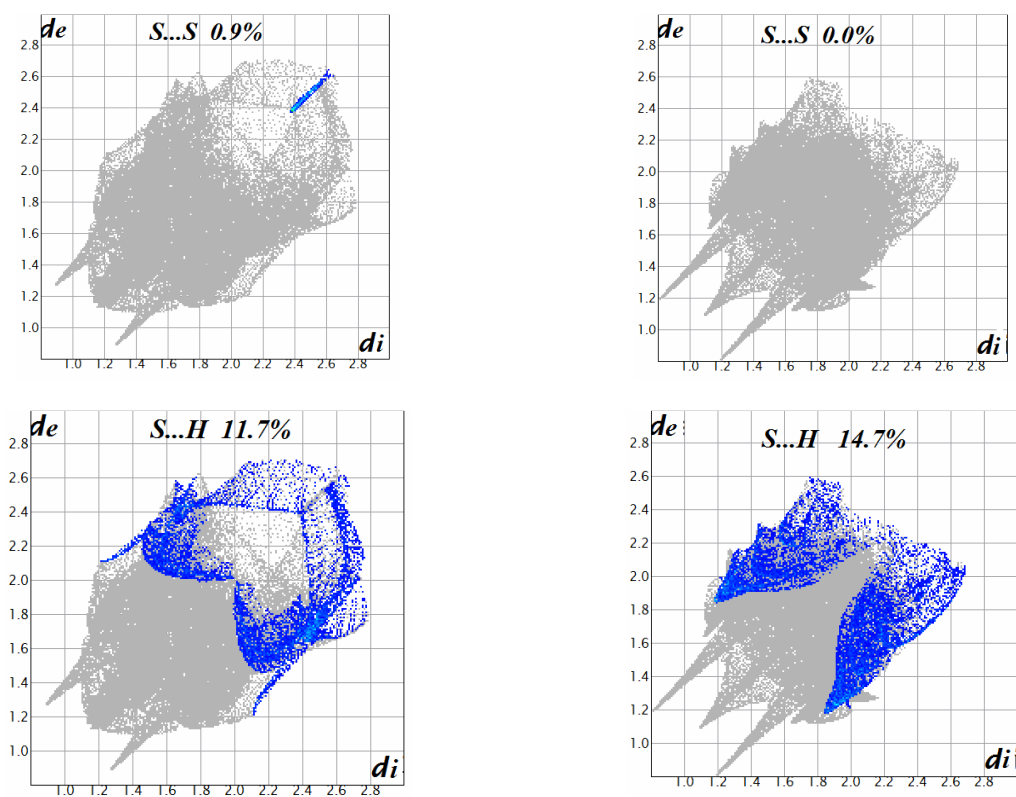

Figure S20: Fingerprint plots for polymorphs **L<sub>a</sub>** and **L<sub>b</sub>**, broken down into contributions from specific pairs of atom types.

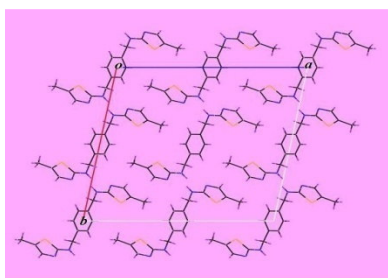

(a)

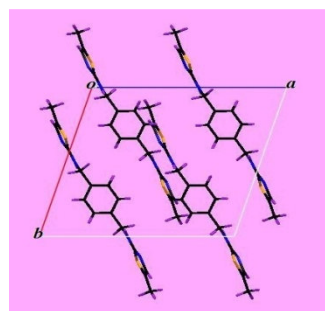

(b)

Figure S21: Crystal packing pattern along the *ab* crystallographic plane of (a) polymorph **L<sub>a</sub>** and (b) polymorph **L<sub>b</sub>**.

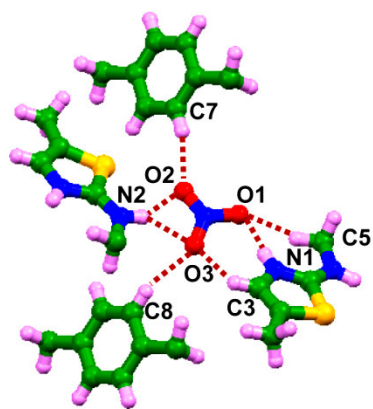

(a)

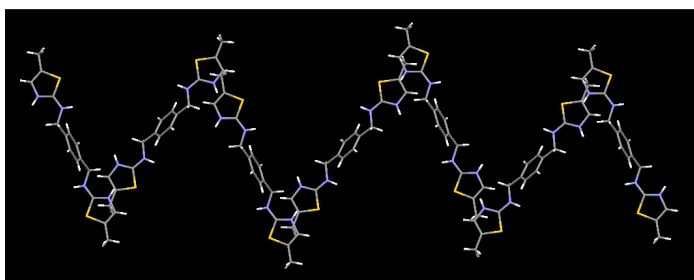

(b)

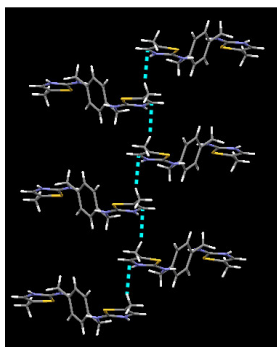

(c)

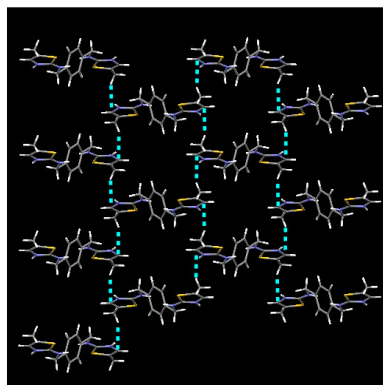

(d)

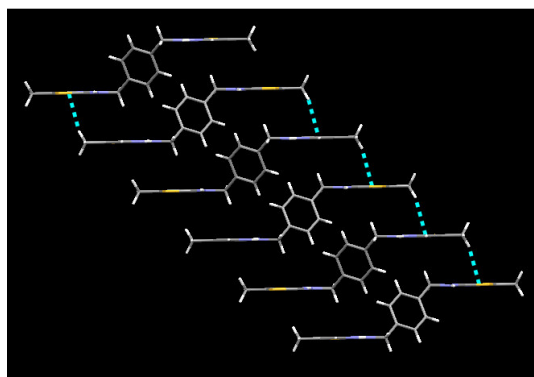

(e)

Figure S22: (a) Environment of nitrate ion in salt **2**. Different assemblies of  $[\text{H}_2\text{L}]^{2+}$  within the crystal lattice of salt **2**: (b) zig-zag type, (c) ladder type, (d) 1D sheet-like, and (e) staircase type.

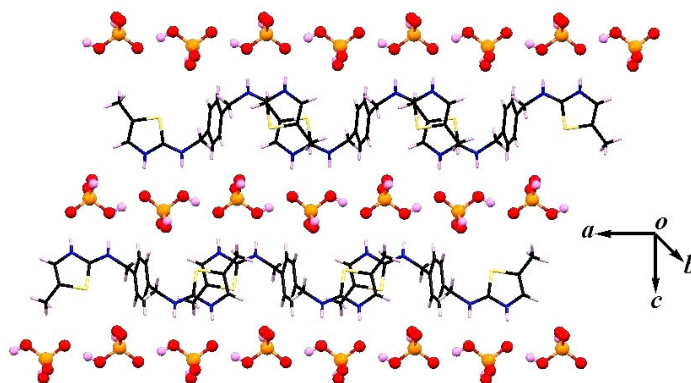

Figure S23: Packing diagram of salt **3** showing alternating layers of  $[\text{H}_2\text{L}]^{2+}$  cations and  $\text{H}_2\text{PO}_4^-$  anions.

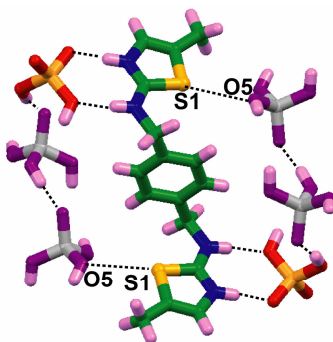

Figure S24: phosphoric acid molecules and biphosphate anions around  $[\text{H}_2\text{L}]^{2+}$  in salt **3**.

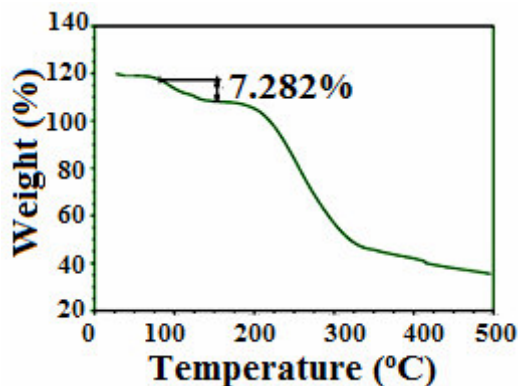Figure S25: TGA plot of **1** (heating rate 5 °C/min).**Table 2S:** Hydrogen-bond parameters in **L<sub>a</sub>**, **L<sub>b</sub>**, **1**, **2**, and **3**.

| Compound No.  | D-H...A                              | $d_{D-H}(\text{\AA})$ | $d_{H...A}(\text{\AA})$ | $d_{D...A}(\text{\AA})$ | $\angle D-H...A(^{\circ})$ |
|---------------|--------------------------------------|-----------------------|-------------------------|-------------------------|----------------------------|
| <b>La</b>     | N(2)-H(2)···N(1) [1/2-x,1/2-y,1-z]   | 0.86                  | 2.28                    | 3.011(5)                | 142(2)                     |
| <b>Lb</b>     | N(2)-H(2)···N(1) [1-x,1-y,-z]        | 0.86                  | 2.14                    | 2.939(2)                | 154(2)                     |
| <b>Salt 1</b> | N(1)-H(1)···O(1)                     | 0.86                  | 1.87                    | 2.717(4)                | 170                        |
|               | O(1)-H(1P)···Br(1)                   | 0.86(3)               | 2.44(3)                 | 3.297(3)                | 176(4)                     |
|               | O(1)-H(1Q)···Br(1)                   | 0.87(6)               | 2.41(5)                 | 3.260(3)                | 165(7)                     |
|               | N(2)-H(2)···Br(1)                    | 0.86                  | 2.51                    | 3.364(3)                | 172                        |
| <b>Salt 2</b> | N(1)-H(1)···O(1)                     | 0.86                  | 1.94                    | 2.790(5)                | 172                        |
|               | N(1)-H(1)···O(3)                     | 0.86                  | 2.57                    | 3.122(5)                | 123                        |
|               | N(2)-H(2)···O(2) [1/2-x,1/2+y,1/2-z] | 0.86                  | 2.28                    | 3.060(5)                | 150                        |
|               | N(2)-H(2)···O(3) [1/2-x,1/2+y,1/2-z] | 0.86                  | 2.23                    | 3.018(5)                | 152                        |
|               | C(5)-H(5B)···O(1)                    | 0.97                  | 2.41                    | 3.304(6)                | 153                        |
|               | C(7)-H(7)···O(2) [1/2+x,1/2-y,1/2+z] | 0.93                  | 2.48                    | 3.391(6)                | 167                        |
|               | Intra C(5)-H(5B)···N(1)              | 0.97                  | 2.60                    | 2.962(6)                | 102                        |
|               | C(8)-H(8)···O(3)                     | 0.93                  | 2.674                   | 3.572                   | 162                        |
| <b>Salt 3</b> | C(3)-H(3)···O(3)                     | 0.93                  | 2.714                   | 3.212                   | 115                        |
|               | N(1)-H(1)···O(4)                     | 0.86                  | 1.91                    | 2.760(3)                | 167                        |
|               | N(2)-H(2)···O(3)                     | 0.86                  | 1.96                    | 2.817(3)                | 178                        |
|               | O(2)-H(2P)···O(6) [-1+x,y,z]         | 0.85(19)              | 1.78(2)                 | 2.615(2)                | 170(3)                     |
|               | O(3)-H(3P)···O(4) [x,1/2-y,-1/2+z]   | 0.86(2)               | 1.62(2)                 | 2.480(2)                | 177(4)                     |
|               | O(5)-H(5Q)···O(1)                    | 0.85(2)               | 1.76(2)                 | 2.605(2)                | 174(3)                     |
|               | O(7)-H(7P)···O(6) [x,1/2-y,-1/2+z]   | 0.85(2)               | 1.76(2)                 | 2.601(2)                | 174(3)                     |
|               | O(8)-H(8P)···O(1) [x,1/2-y,-1/2+z]   | 0.86(2)               | 1.71(2)                 | 2.565(2)                | 177(3)                     |
|               | C(3)-H(3)···O(2) [x,1/2-y,1/2+z]     | 0.93                  | 2.53                    | 3.330(3)                | 145                        |
